# Supplementary material
Source: publisher figshare collection journal article supplement (https://karger.figshare.com/articles/dataset/_/5216545)
Supplement: Supplementary file 1 [file 1]

Archive with 3 entries (3 files):
- FDT_201701017_1_4_Supplementary_Figure_1.pdf
- FDT_201701017_1_5_Supplementary_Figure_2.pdf
- FDT_201701017_1_6_Supplementary_Table_1_PDF.PDF
