# Supplementary material
Source: publisher figshare collection journal article supplement (https://karger.figshare.com/articles/dataset/_/5216545)
Supplement: Supplementary file 1 [file 1 › FDT_201701017_1_4_Supplementary_Figure_1.pdf]

Supplementary Figure 1: ROC curve of high 32-week AC z-score (>90<sup>th</sup> centile) (\_\_\_\_) and combination of high 32-week AC z-score (>90<sup>th</sup> centile) plus 22- to 32-week high AC z-velocity (highest decile)(- - -) for the prediction of LGA.

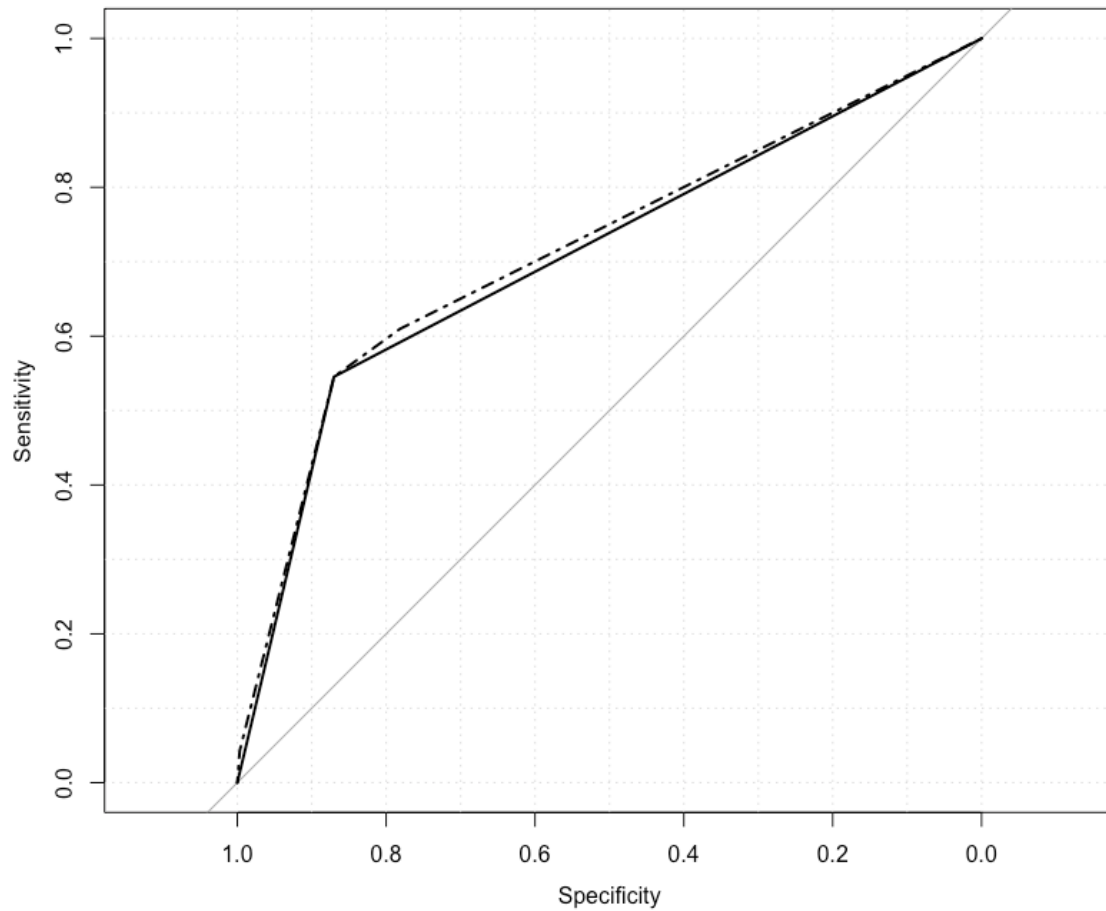

\*AUC 0.71 (\_\_\_\_) vs. 0.72 (- - -) [p=0.2063]
