# Supplementary material
Source: publisher figshare collection journal article supplement (https://karger.figshare.com/articles/dataset/_/5216545)
Supplement: Supplementary file 1 [file 1 › FDT_201701017_1_5_Supplementary_Figure_2.pdf]

Supplementary Figure 2: ROC curve of high 32-week AC z-score (>90<sup>th</sup> centile) (\_\_\_\_) and combination of high 32-week AC z-score (>90<sup>th</sup> centile) plus 22- to 32-week high AC z-velocity (highest decile)(- - -) for the prediction of Macrosomia

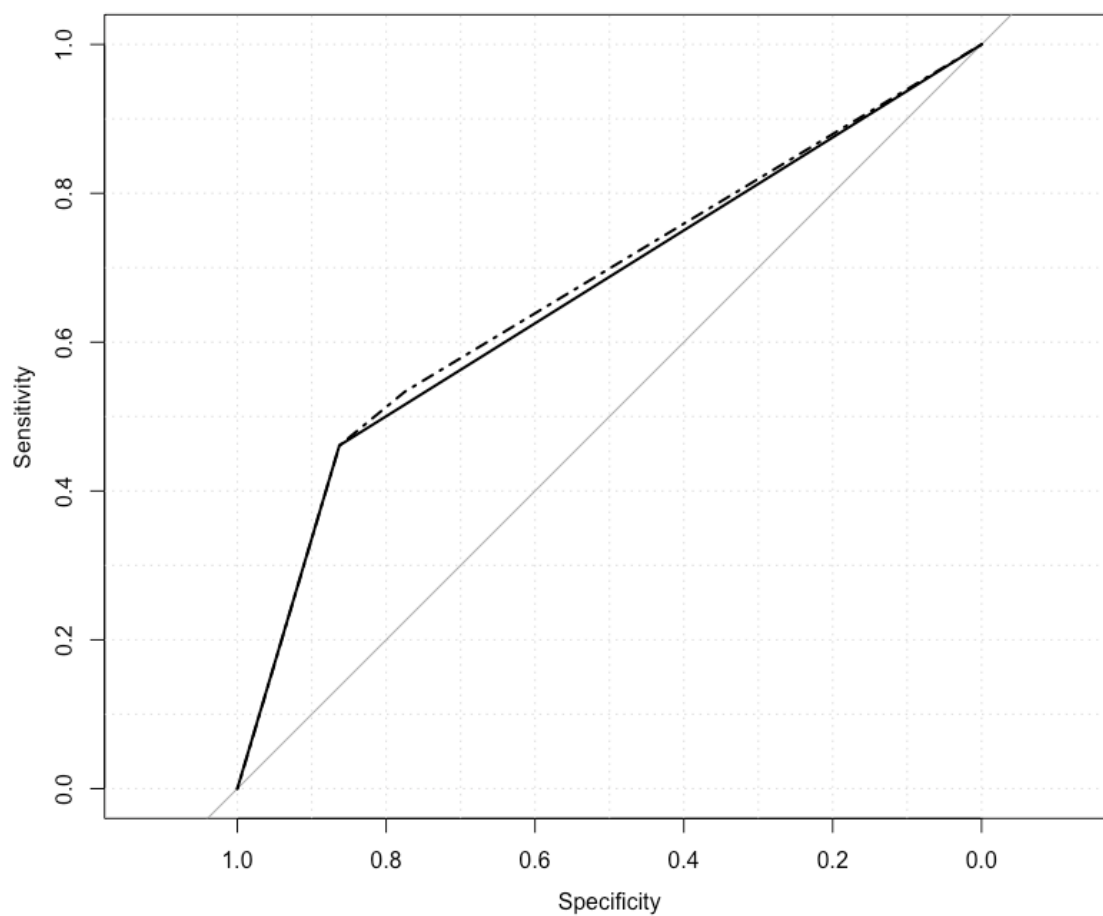

\*AUC 0.66 (\_\_\_\_) vs. 0.67 (- - -) [p=0.3681]
