# Supplementary material
Source: publisher figshare collection journal article supplement (https://karger.figshare.com/articles/dataset/_/5216545)
Supplement: Supplementary file 1 [file 1 › FDT_201701017_1_6_Supplementary_Table_1_PDF.PDF]

Supplementary table 1: Logistic regression models for the association of cross-sectional high AC z-score (>90<sup>th</sup> centile) and high AC z-velocity (highest decile) with LGA and macrosomia.

| Outcome    | Model                                   | Naegelkerke R <sup>2</sup> | Parameter           | B    | OR   | IC 95% |       | p*     |
|------------|-----------------------------------------|----------------------------|---------------------|------|------|--------|-------|--------|
| LGA        | High AC z-score plus high AC z-velocity | 0.153                      | High AC z-score 32w | 2.14 | 8.47 | 6.17   | 11.62 | <0.001 |
|            |                                         |                            | High AC z-velocity  | 0.59 | 1.81 | 1.08   | 3.01  | 0.024  |
| Macrosomia | High AC z-score plus high AC z-velocity | 0.095                      | High AC z-score 32w | 1.7  | 5.48 | 3.99   | 7.53  | <0.001 |
|            |                                         |                            | High AC z-velocity  | 0.24 | 1.27 | 0.74   | 2.19  | 0.389  |
